# Supplementary material for: Positive In Vitro Effect of ROCK Pathway Inhibitor Y-27632 on Qualitative Characteristics of Goat Sperm Stored at Low Temperatures
Source: MDPI journal article supplement (doi:10.3390/ani14101441), 2024-05-12
Supplement: s1 [file s1]

**Table S1.** Differential metabolites of goat sperm between Y-27632 group and control group.

| Name                                   | RT       | MZ         | VIP        | P-value    | FC         |
|----------------------------------------|----------|------------|------------|------------|------------|
| L-Lactic acid                          | 133.891  | 89.0246455 | 1.59765039 | 0.01324752 | 0.79613995 |
| cis,cis-Muconic acid                   | 202.124  | 141.017654 | 1.50108415 | 0.02231381 | 0.89186374 |
| Itaconic acid                          | 254.951  | 129.019709 | 1.49954683 | 0.02567359 | 0.88448404 |
| Allopurinol-1-ribonucleoside           | 129.574  | 269.086657 | 1.89097145 | 0.00640433 | 0.89395234 |
| Gallic acid                            | 23.1374  | 169.018331 | 1.60305019 | 0.01623787 | 0.81468869 |
| SM(d18:1/16:0)                         | 114.263  | 703.571584 | 1.73186466 | 0.02052285 | 0.80129146 |
| L-Glutamic acid                        | 233.331  | 146.046461 | 1.27994411 | 0.04672727 | 0.80082779 |
| L-Malic acid                           | 237.155  | 133.014766 | 2.18593308 | 0.00076379 | 0.68312241 |
| L-Palmitoylcarnitine                   | 103.043  | 400.339049 | 1.9317731  | 0.00209023 | 0.85964016 |
| Propionylcarnitine                     | 171.971  | 218.13747  | 1.70235611 | 0.00533164 | 1.14907337 |
| Indolelactic acid                      | 62.9337  | 204.067583 | 2.22982898 | 0.00008847 | 0.68805644 |
| Gingerol                               | 15.178   | 293.180347 | 1.40672123 | 0.02641954 | 0.66844547 |
| Salviaflaside methyl ester             | 130.129  | 537.164086 | 1.75910088 | 0.01211489 | 0.83888769 |
| Hydroxyphenyllactic acid               | 106.166  | 181.051268 | 2.17860415 | 0.00011832 | 0.72728677 |
| PC(22:5(4Z,7Z,10Z,13Z,16Z)/18:0)       | 39.5299  | 836.607492 | 1.53736094 | 0.02624390 | 0.86279357 |
| 2',4'-Dihydroxyacetophenone            | 117.241  | 151.040632 | 2.36023093 | 0.00000267 | 1.70691396 |
| Erythrulose                            | 17.8604  | 165.041564 | 1.49379247 | 0.04813945 | 0.66951219 |
| PC(22:5(7Z,10Z,13Z,16Z,19Z)/18:1(11Z)) | 21.155   | 834.592336 | 1.57245355 | 0.01550070 | 0.8063452  |
| Succinic anhydride                     | 222.478  | 99.009182  | 1.73405992 | 0.01866335 | 0.88760327 |
| trans-Aconitic acid                    | 254.869  | 173.009548 | 1.43978879 | 0.03907058 | 0.88249207 |
| Pyrrolidine                            | 182.913  | 72.0803042 | 1.37147252 | 0.03216485 | 0.8602252  |
| Glycerol                               | 49.0764  | 91.0403299 | 1.49602052 | 0.02760388 | 0.82478496 |
| 4-Hydroxyphenylpyruvate                | 40.439   | 179.035394 | 1.70894906 | 0.00861398 | 0.82490118 |
| Decanoylcarnitine                      | 119.621  | 316.246038 | 1.62625    | 0.00232910 | 1.70701392 |
| Hydroxypropionic acid                  | 35.6959  | 89.0246728 | 1.94478092 | 0.00159602 | 0.84115341 |
| 2-Methylbenzoic acid                   | 54.1835  | 135.045578 | 2.54435808 | 0.00000077 | 2.39718838 |
| Phenyllactic acid                      | 41.6306  | 165.05619  | 2.12899048 | 0.00030842 | 0.73738444 |
| Threonic acid                          | 188.653  | 135.030305 | 1.38826469 | 0.03650358 | 0.78095966 |
| PC(22:4(7Z,10Z,13Z,16Z)/16:0)          | 21.49945 | 810.595661 | 1.70876997 | 0.00655316 | 0.82493022 |
| SM(d18:1/24:1(15Z))                    | 128.261  | 813.679446 | 1.75493038 | 0.01231242 | 0.74011976 |
| Butyrylcarnitine                       | 159.834  | 232.152939 | 2.22239953 | 0.00000875 | 1.26848504 |
| Dihydroxyacetone phosphate             | 250.769  | 168.991321 | 1.99829326 | 0.00199501 | 0.82436614 |
| Cholesterol sulfate                    | 15.1798  | 465.304792 | 1.40636932 | 0.04381911 | 0.81215428 |
| PC(P-18:1(9Z)/15:0)                    | 110.789  | 730.591612 | 1.62718169 | 0.01607234 | 0.77854557 |
| Isocrotonic acid                       | 167.267  | 87.0434678 | 1.4443396  | 0.03856951 | 0.85206082 |
| PE(16:0/18:2(9Z,12Z))                  | 48.821   | 714.508096 | 1.93606174 | 0.00784278 | 0.70973609 |
| Betaine aldehyde                       | 157.264  | 102.090595 | 1.59682027 | 0.00961540 | 0.78903669 |
| SM(d16:1/24:1(15Z))                    | 111.552  | 785.647166 | 1.61443194 | 0.03932800 | 0.74390733 |
| SM(d18:0/18:0)                         | 112.96   | 733.609821 | 1.81176267 | 0.01415814 | 0.75413691 |
| gamma-Aminobutyric acid                | 233.306  | 104.06987  | 1.34699788 | 0.04153755 | 0.90077592 |
| L-Glutamine                            | 250.243  | 147.075463 | 1.42852017 | 0.04038471 | 0.95866416 |

|                                                |          |            |            |            |            |
|------------------------------------------------|----------|------------|------------|------------|------------|
| Leucinic acid                                  | 49.5423  | 131.071894 | 1.51031485 | 0.01441341 | 0.74806815 |
| D-Glutamine                                    | 220.568  | 145.062519 | 1.41755549 | 0.02910294 | 0.82792313 |
| Taurine                                        | 177.641  | 124.007856 | 1.28721403 | 0.04656506 | 0.83607269 |
| Trehalose                                      | 216.208  | 341.110559 | 1.58664716 | 0.02402891 | 0.69099304 |
| SM(d18:0/18:1(9Z))                             | 154.054  | 731.603228 | 1.79944416 | 0.03646287 | 0.46259078 |
| PC(22:6(4Z,7Z,10Z,13Z,16Z,19Z)/18:1(11Z))      | 20.438   | 832.578686 | 1.81098055 | 0.00734346 | 0.72189456 |
| 1,2,3-Trihydroxybenzene                        | 153.538  | 125.0249   | 1.50930472 | 0.01765315 | 0.80317989 |
| D-Xylose                                       | 176.306  | 149.045993 | 1.60922234 | 0.04297202 | 0.72145179 |
| Bergapten                                      | 153.457  | 215.033764 | 1.57067647 | 0.03341977 | 0.95426107 |
| Byssochlamic acid                              | 41.096   | 331.120379 | 2.11829732 | 0.00156854 | 0.54843215 |
| PC(22:4(7Z,10Z,13Z,16Z)/P-18:1(11Z))           | 38.1118  | 820.612789 | 1.52761503 | 0.03808034 | 0.8733693  |
| 3-Hydroxycinnamic acid                         | 106.256  | 163.040634 | 2.12165556 | 0.00023919 | 0.7419781  |
| PC(P-18:1(11Z)/20:5(5Z,8Z,11Z,14Z,17Z))        | 20.878   | 790.566099 | 1.64965152 | 0.02324982 | 0.84859034 |
| SM(d18:1/14:0)                                 | 115.565  | 675.539984 | 1.92321024 | 0.00796248 | 0.84070823 |
| Hydroxypropyl-Hydroxyproline                   | 242.542  | 245.111317 | 1.38277432 | 0.02915285 | 0.79266905 |
| N-Palmitoylsphingosine                         | 18.4286  | 538.515108 | 1.83454965 | 0.00185802 | 0.74895449 |
| L-Nicotine                                     | 34.8885  | 163.121899 | 1.95073356 | 0.00250932 | 3.11100302 |
| N-(5-Methyl-3-oxohexyl)alanine                 | 219.434  | 202.142624 | 1.67667643 | 0.01208735 | 0.88445697 |
| PC(P-18:0/16:1(9Z))                            | 40.01325 | 744.583314 | 1.60396629 | 0.04755624 | 0.66663773 |
| L-Iditol                                       | 91.5338  | 181.072439 | 1.57888642 | 0.01665826 | 0.82534491 |
| Bergenin                                       | 171.586  | 373.074547 | 1.54305603 | 0.01872220 | 1.30984682 |
| 4-Imidazolone-5-propionic acid                 | 203.7765 | 157.059593 | 1.90256706 | 0.00135156 | 0.74394448 |
| Pyruvic acid                                   | 73.9164  | 87.0091344 | 1.73602835 | 0.00543077 | 0.91758718 |
| N-(2-Furoyl)glycine                            | 233.683  | 168.028313 | 1.69766577 | 0.01602441 | 0.94450477 |
| (6beta,22E)-6-Hydroxystigmasta-4,22-dien-3-one | 98.7348  | 427.357736 | 1.90181881 | 0.00181325 | 0.81037178 |
| Epidermin                                      | 235.382  | 262.126563 | 1.5819098  | 0.01569775 | 1.17625927 |
| 4-Trimethylammoniobutanoic acid                | 223.063  | 146.116763 | 1.61972072 | 0.01331600 | 0.8758921  |
| Isocitric acid                                 | 266.349  | 173.009806 | 1.4456357  | 0.03209878 | 0.87534763 |
| Betaine                                        | 165.3    | 118.085529 | 1.44558995 | 0.03441459 | 0.92036645 |
| Oxidized-adrenal-ferredoxin                    | 210.215  | 184.092884 | 2.07733833 | 0.00021467 | 0.67849278 |
| (1S,2S,4R,8R)-p-Menthane-1,2,9-triol           | 26.8294  | 189.147003 | 1.58260697 | 0.01279514 | 1.44502675 |
| Deoxyribose 5-phosphate                        | 133.896  | 213.022233 | 1.49877015 | 0.02472029 | 0.83690911 |
| L-Octanoylcarnitine                            | 128.894  | 288.214717 | 2.46286458 | 0.00000007 | 1.78957089 |
| Naringenin                                     | 133.895  | 307.036187 | 1.73840051 | 0.00519099 | 0.86835192 |
| Aesculin                                       | 42.40785 | 339.072766 | 1.62708136 | 0.00722120 | 0.66453606 |
| 5-Aminopentanal                                | 210.219  | 102.090557 | 2.28468398 | 0.00010537 | 0.79522113 |
| PE(20:2(11Z,14Z)/14:0)                         | 48.6721  | 716.515319 | 1.63754648 | 0.02739182 | 0.86692028 |
| Panaquinquecol 4                               | 207.417  | 275.158686 | 1.39390153 | 0.04006072 | 0.8783675  |
| o-Cresol                                       | 40.4397  | 107.05052  | 1.78090464 | 0.00557429 | 0.8207636  |
| Calystegine B2                                 | 144.17   | 176.090564 | 1.7367159  | 0.00586044 | 0.73273736 |
| 9,10-Epoxyoctadecenoic acid                    | 27.79005 | 295.228954 | 2.16552698 | 0.00003427 | 0.50883506 |
| cis-5-Tetradecenoylcarnitine                   | 107.575  | 370.292822 | 1.97983075 | 0.00119355 | 0.81352983 |
| Tryptophyl-Proline                             | 155.2235 | 302.147927 | 1.68495379 | 0.00781944 | 0.76845153 |

|                                               |          |            |            |            |            |
|-----------------------------------------------|----------|------------|------------|------------|------------|
| PE(18:0/14:1(9Z))                             | 51.609   | 690.50073  | 2.00177361 | 0.00308607 | 0.78015166 |
| 7,8-Dehydro-beta-micropteroxanthin            | 104.92   | 395.296064 | 1.64292118 | 0.01000877 | 0.61435799 |
| PC(16:0/15:0)                                 | 50.6692  | 720.538132 | 1.65899162 | 0.03028136 | 0.8174672  |
| 2-Oxo-4-methylthiobutanoic acid               | 31.1015  | 147.012488 | 1.482562   | 0.02889540 | 0.83078657 |
| Koeniginequinone A                            | 238.567  | 242.077754 | 1.53775375 | 0.02568826 | 0.93271057 |
| Phenylalanyl-Methionine                       | 106.893  | 297.127274 | 1.864503   | 0.00247919 | 1.48644057 |
| Isocaproic acid                               | 24.71285 | 117.090103 | 2.10472657 | 0.00140485 | 1.64053914 |
| 25-Hydroxycholesterol                         | 101.235  | 425.342195 | 1.9169239  | 0.00127904 | 0.79242571 |
| Oxymorphone                                   | 245.491  | 302.132378 | 2.20629148 | 0.00015070 | 0.76431171 |
| LysoPE(0:0/22:5(4Z,7Z,10Z,13Z,16Z))           | 116.2625 | 528.305063 | 1.86205401 | 0.00066887 | 0.4990716  |
| Bovinic acid                                  | 49.4644  | 279.233432 | 1.85820738 | 0.00347730 | 0.67627413 |
| Tryptophyl-Valine                             | 261.0695 | 304.159419 | 1.54700766 | 0.01577616 | 0.82981681 |
| Calcitriol                                    | 103.468  | 399.326585 | 2.03730669 | 0.00069627 | 0.80819253 |
| PE(22:1(13Z)/14:1(9Z))                        | 46.6432  | 744.546184 | 1.76965912 | 0.00770739 | 0.79043918 |
| Squamolone                                    | 90.29785 | 129.065047 | 1.32205734 | 0.03813924 | 1.38284009 |
| 3-Methyl-2-oxopentanoate                      | 28.4272  | 129.056205 | 2.10109174 | 0.00044151 | 0.65023568 |
| 3-Hydroxyisovaleryl carnitine                 | 186.85   | 262.163634 | 1.8321443  | 0.00493021 | 0.8583339  |
| Methylmalonic acid semialdehyde               | 210.219  | 103.038249 | 2.36848323 | 0.00000950 | 0.81881615 |
| (4-Hydroxybenzoyl)choline                     | 303.6305 | 224.126349 | 1.34595446 | 0.04363992 | 0.73128929 |
| SM(d18:1/18:1(9Z))                            | 110.877  | 729.583891 | 1.42866717 | 0.03567001 | 0.81739508 |
| Gynocardin                                    | 197.988  | 304.098875 | 1.31673875 | 0.04966026 | 1.19275418 |
| LysoPE(0:0/18:0)                              | 125.55   | 482.322074 | 1.56724826 | 0.02063716 | 0.83897397 |
| trans-Hexadec-2-enoyl carnitine               | 103.5    | 398.324472 | 2.05876836 | 0.00057043 | 0.80981743 |
| PI(20:3(5Z,8Z,11Z)/18:1(11Z))                 | 124.235  | 887.559422 | 1.49772861 | 0.02847439 | 0.79573375 |
| 9,10-epoxyoctadecanoic acid                   | 27.7866  | 297.244059 | 2.15929556 | 0.00002729 | 0.59758447 |
| Acetylglycine                                 | 26.47365 | 116.035813 | 1.25595605 | 0.04826434 | 0.83531139 |
| Myristic acid                                 | 26.1749  | 227.20273  | 2.27696484 | 0.00000886 | 0.69786657 |
| Stearic acid                                  | 20.4784  | 283.265408 | 1.77110876 | 0.02665119 | 0.73508209 |
| LysoPC(20:0/0:0)                              | 118.942  | 552.399076 | 1.41839302 | 0.04012743 | 0.83440764 |
| beta-Alanine                                  | 165.5535 | 88.0407902 | 1.27948721 | 0.04868070 | 0.80041283 |
| (25S)-26-Hydroxy-24-methylenecycloartan-3-one | 94.69145 | 455.390393 | 2.28558572 | 0.00000004 | 2.17329446 |
| 2-Acetylpyrazine                              | 31.001   | 123.054497 | 2.44681402 | 0.00000001 | 2.33687186 |
| 4-(4-Hydroxyphenyl)-2-butanone glucoside      | 130.129  | 327.139479 | 1.67650415 | 0.02443232 | 0.91996558 |
| Citrulline                                    | 218.038  | 176.101725 | 1.72505389 | 0.00692877 | 0.76280652 |
| 1-Isothiocyanato-7-(methylsulfinyl)heptane    | 194.03   | 220.080109 | 1.19820421 | 0.03086210 | 0.24818323 |
| 4-Hydroxybenzyl isothiocyanate rhamnoside     | 196.325  | 312.090325 | 1.65247746 | 0.00754396 | 0.72948656 |
| trans-Cinnamic acid                           | 41.6919  | 147.045635 | 2.06385891 | 0.00063168 | 0.72579964 |
| Docosa-4,7,10,13,16-pentaenoyl carnitine      | 91.1821  | 474.355532 | 1.93538332 | 0.00161277 | 0.77803099 |
| 4-(Methylthio)-1-butanol                      | 215.9015 | 121.078371 | 1.33269236 | 0.03493340 | 1.26321993 |
| 2,5-Dihydro-2,4-dimethyloxazole               | 27.9266  | 100.074942 | 1.77894668 | 0.00376251 | 1.44160054 |
| 2,3,4,5-Tetrahydropiperidine-2-carboxylate    | 31.5205  | 128.082904 | 2.46452875 | 0.00000006 | 3.38071153 |
| 3-Hydroxy-beta-ionone                         | 18.332   | 209.15195  | 1.87244761 | 0.00443354 | 1.34500236 |
| Palmitoleic acid                              | 49.3616  | 253.218309 | 2.13267487 | 0.00014764 | 0.54884374 |

|                                                                                                     |         |            |            |            |            |
|-----------------------------------------------------------------------------------------------------|---------|------------|------------|------------|------------|
| 2-Amino-4-oxo-4- $\alpha$ -hydroxy-6-(erythro-1',2',3'-trihydroxypropyl)-5,6,7,8-tetrahydroxypterin | 149.827 | 322.09633  | 1.34014718 | 0.02560379 | 1.20776678 |
| $\alpha$ -Amino-2,5-dihydro-5-oxo-4-isoxazolepropanoic acid N2-glucoside                            | 179.855 | 335.103417 | 1.28893114 | 0.04416264 | 0.84020253 |
| LysoPE(20:4(8Z,11Z,14Z,17Z)/0:0)                                                                    | 117.624 | 502.28869  | 2.32682311 | 0.00000366 | 0.37678891 |
| L-Hexanoylcarnitine                                                                                 | 141.314 | 260.183956 | 2.45877692 | 0.00000001 | 1.87635521 |

RT, the chromatographic retention time of the substance; MZ, the mass to charge ratio of characteristic ions in a substance; VIP, variable importance in projection; *P*-value, obtained from the t-test of the substance in this group comparison; FC, fold change.

**Table S2.** Enrichment analysis of differential metabolites in goat sperm from Y-27632 group and control group.

| Name                                     | <i>P</i> -value | Number | Name                                                   | <i>P</i> -value | Number |
|------------------------------------------|-----------------|--------|--------------------------------------------------------|-----------------|--------|
| Metabolic pathways                       | 0.0005717       | 39     | Purine metabolism                                      | 0.6320106       | 1      |
| ABC transporters                         | 0.0000491       | 8      | Valine, leucine and isoleucine biosynthesis            | 0.2056172       | 1      |
| Carbon metabolism                        | 0.0008045       | 6      | Tyrosine metabolism                                    | 0.5441961       | 1      |
| Biosynthesis of amino acids              | 0.0014754       | 6      | Phosphonate and phosphinate metabolism                 | 0.4302910       | 1      |
| Central carbon metabolism in cancer      | 0.0000012       | 6      | Glutathione metabolism                                 | 0.3168086       | 1      |
| D-Amino acid metabolism                  | 0.0004664       | 5      | Starch and sucrose metabolism                          | 0.3098947       | 1      |
| Glyoxylate and dicarboxylate metabolism  | 0.0003242       | 5      | Amino sugar and nucleotide sugar metabolism            | 0.6970690       | 1      |
| Biosynthesis of cofactors                | 0.2235488       | 5      | Neomycin, kanamycin and gentamicin biosynthesis        | 0.5578916       | 1      |
| Pentose and glucuronate interconversions | 0.0024267       | 4      | Inositol phosphate metabolism                          | 0.3760650       | 1      |
| Glycerophospholipid metabolism           | 0.0021312       | 4      | Glycosylphosphatidylinositol (GPI)-anchor biosynthesis | 0.0391573       | 1      |
| Propanoate metabolism                    | 0.0005950       | 4      | Arachidonic acid metabolism                            | 0.5300865       | 1      |
| 2-Oxocarboxylic acid metabolism          | 0.0426780       | 4      | alpha-Linolenic acid metabolism                        | 0.3568934       | 1      |
| Retrograde endocannabinoid signaling     | 0.0000294       | 4      | Sphingolipid metabolism                                | 0.2214053       | 1      |
| Glucagon signaling pathway               | 0.0001077       | 4      | Thiamine metabolism                                    | 0.2669531       | 1      |
| Glycolysis / Gluconeogenesis             | 0.0033813       | 3      | Vitamin B6 metabolism                                  | 0.2520675       | 1      |
| Citrate cycle (TCA cycle)                | 0.0009253       | 3      | Porphyrin metabolism                                   | 0.7775908       | 1      |
| Fatty acid biosynthesis                  | 0.0192801       | 3      | Terpenoid backbone biosynthesis                        | 0.3697373       | 1      |
| Arginine biosynthesis                    | 0.0014079       | 3      | Sulfur metabolism                                      | 0.2815492       | 1      |
| Pyrimidine metabolism                    | 0.0249876       | 3      | Biosynthesis of unsaturated fatty acids                | 0.5252892       | 1      |

|                                             |           |   |                                                     |           |   |
|---------------------------------------------|-----------|---|-----------------------------------------------------|-----------|---|
| Alanine, aspartate and glutamate metabolism | 0.0025159 | 3 | Fatty acid metabolism                               | 0.7092584 | 1 |
| Glycine, serine and threonine metabolism    | 0.0115738 | 3 | cAMP signaling pathway                              | 0.2214053 | 1 |
| Taurine and hypotaurine metabolism          | 0.0014079 | 3 | FoxO signaling pathway                              | 0.0487102 | 1 |
| Linoleic acid metabolism                    | 0.0025159 | 3 | Sphingolipid signaling pathway                      | 0.1392782 | 1 |
| Pyruvate metabolism                         | 0.0037054 | 3 | Phospholipase D signaling pathway                   | 0.1041095 | 1 |
| Neuroactive ligand-receptor interaction     | 0.0143882 | 3 | Autophagy - other                                   | 0.0295108 | 1 |
| Proximal tubule bicarbonate reclamation     | 0.0005635 | 3 | Autophagy - animal                                  | 0.0581703 | 1 |
| Protein digestion and absorption            | 0.0109252 | 3 | AMPK signaling pathway                              | 0.1976063 | 1 |
| Pentose phosphate pathway                   | 0.0466306 | 2 | Ferroptosis                                         | 0.2520675 | 1 |
| Fructose and mannose metabolism             | 0.0997576 | 2 | Necroptosis                                         | 0.0951003 | 1 |
| Galactose metabolism                        | 0.0757831 | 2 | Gap junction                                        | 0.1041095 | 1 |
| Ascorbate and aldarate metabolism           | 0.1092381 | 2 | Circadian entrainment                               | 0.0860026 | 1 |
| Primary bile acid biosynthesis              | 0.0786657 | 2 | Thermogenesis                                       | 0.2056172 | 1 |
| Cysteine and methionine metabolism          | 0.1389882 | 2 | Long-term potentiation                              | 0.0675385 | 1 |
| Lysine degradation                          | 0.0875165 | 2 | Synaptic vesicle cycle                              | 0.1130310 | 1 |
| Arginine and proline metabolism             | 0.1597131 | 2 | Long-term depression                                | 0.0860026 | 1 |
| Histidine metabolism                        | 0.0786657 | 2 | Insulin secretion                                   | 0.1130310 | 1 |
| Phenylalanine metabolism                    | 0.0845333 | 2 | Regulation of lipolysis in adipocytes               | 0.1306146 | 1 |
| beta-Alanine metabolism                     | 0.0396028 | 2 | Parathyroid hormone synthesis, secretion and action | 0.0951003 | 1 |

|                                                     |           |   |                                                           |           |   |
|-----------------------------------------------------|-----------|---|-----------------------------------------------------------|-----------|---|
| Glycerolipid metabolism                             | 0.0540798 | 2 | Type II diabetes mellitus                                 | 0.0581703 | 1 |
| Butanoate metabolism                                | 0.0786657 | 2 | Insulin resistance                                        | 0.1730973 | 1 |
| Nicotinate and nicotinamide metabolism              | 0.1028906 | 2 | Endocrine and other factor-regulated calcium reabsorption | 0.0768157 | 1 |
| Pantothenate and CoA biosynthesis                   | 0.0351671 | 2 | Amyotrophic lateral sclerosis                             | 0.1306146 | 1 |
| Nitrogen metabolism                                 | 0.0148078 | 2 | Huntington disease                                        | 0.0581703 | 1 |
| Aminoacyl-tRNA biosynthesis                         | 0.0966528 | 2 | Spinocerebellar ataxia                                    | 0.0675385 | 1 |
| HIF-1 signaling pathway                             | 0.0093237 | 2 | Pathways of neurodegeneration - multiple diseases         | 0.2742870 | 1 |
| Glutamatergic synapse                               | 0.0025984 | 2 | Cocaine addiction                                         | 0.0675385 | 1 |
| GABAergic synapse                                   | 0.0033198 | 2 | Amphetamine addiction                                     | 0.0860026 | 1 |
| Taste transduction                                  | 0.0396028 | 2 | Nicotine addiction                                        | 0.0675385 | 1 |
| Mineral absorption                                  | 0.0330276 | 2 | Alcoholism                                                | 0.0951003 | 1 |
| Choline metabolism in cancer                        | 0.0050084 | 2 | Tuberculosis                                              | 0.0860026 | 1 |
| Fatty acid degradation                              | 0.3946779 | 1 | Kaposi sarcoma-associated herpesvirus infection           | 0.0487102 | 1 |
| Steroid biosynthesis                                | 0.4417008 | 1 | Pathways in cancer                                        | 0.2669531 | 1 |
| Ubiquinone and other terpenoid-quinone biosynthesis | 0.5106085 | 1 | Renal cell carcinoma                                      | 0.0295108 | 1 |
| Steroid hormone biosynthesis                        | 0.6320106 | 1 | Diabetic cardiomyopathy                                   | 0.3236549 | 1 |

*P*-value, obtained from the t-test of the substance in this group comparison; Number, the number of differential metabolites in this pathway.

**Table S3.** Analysis of the metabolic pathway of goat sperm in Y-27632 group and control group.

| Pathway                                     | Total | Hits | Raw p    | Holm<br>adjust | Impact  |
|---------------------------------------------|-------|------|----------|----------------|---------|
| D-Glutamine and D-glutamate metabolism      | 5     | 3    | 0.000468 | 0.037905       | 1       |
| Nitrogen metabolism                         | 9     | 2    | 0.041713 | 1              | 0       |
| Alanine, aspartate and glutamate metabolism | 23    | 3    | 0.05148  | 1              | 0.4     |
| Glycolysis or Gluconeogenesis               | 26    | 3    | 0.069899 | 1              | 0.09891 |
| Glycine, serine and threonine metabolism    | 32    | 3    | 0.1142   | 1              | 0       |
| beta-Alanine metabolism                     | 17    | 2    | 0.13046  | 1              | 0.44444 |
| Glycerolipid metabolism                     | 18    | 2    | 0.14339  | 1              | 0.28098 |
| Propanoate metabolism                       | 20    | 2    | 0.16999  | 1              | 0       |
| Butanoate metabolism                        | 20    | 2    | 0.16999  | 1              | 0       |
| Citrate cycle (TCA cycle)                   | 20    | 2    | 0.16999  | 1              | 0.11316 |
| Linoleic acid metabolism                    | 5     | 1    | 0.17368  | 1              | 0       |
| Pyruvate metabolism                         | 22    | 2    | 0.19737  | 1              | 0.18754 |
| Arginine and proline metabolism             | 44    | 3    | 0.22477  | 1              | 0.12721 |
| Taurine and hypotaurine metabolism          | 7     | 1    | 0.23455  | 1              | 0.75    |
| Cysteine and methionine metabolism          | 28    | 2    | 0.28174  | 1              | 0.10095 |
| Valine, leucine and isoleucine biosynthesis | 11    | 1    | 0.34337  | 1              | 0       |
| Histidine metabolism                        | 14    | 1    | 0.41489  | 1              | 0.07194 |
| Pantothenate and CoA biosynthesis           | 15    | 1    | 0.43699  | 1              | 0       |
| Pentose and glucuronate interconversions    | 15    | 1    | 0.43699  | 1              | 0.08333 |
| Glyoxylate and dicarboxylate metabolism     | 16    | 1    | 0.45826  | 1              | 0       |
| Fructose and mannose metabolism             | 19    | 1    | 0.51747  | 1              | 0.02273 |
| Pentose phosphate pathway                   | 19    | 1    | 0.51747  | 1              | 0.06757 |
| Primary bile acid biosynthesis              | 46    | 2    | 0.52066  | 1              | 0.04033 |
| Lysine degradation                          | 20    | 1    | 0.53576  | 1              | 0.01493 |
| Starch and sucrose metabolism               | 23    | 1    | 0.58664  | 1              | 0       |
| Galactose metabolism                        | 26    | 1    | 0.63204  | 1              | 0       |
| Glutathione metabolism                      | 26    | 1    | 0.63204  | 1              | 0.05534 |
| Inositol phosphate metabolism               | 28    | 1    | 0.65955  | 1              | 0       |
| Glycerophospholipid metabolism              | 29    | 1    | 0.67254  | 1              | 0.02442 |
| Steroid biosynthesis                        | 35    | 1    | 0.74086  | 1              | 0       |
| Pyrimidine metabolism                       | 37    | 1    | 0.76036  | 1              | 0       |
| Fatty acid biosynthesis                     | 38    | 1    | 0.76957  | 1              | 0       |
| Fatty acid metabolism                       | 39    | 1    | 0.77842  | 1              | 0       |
| Biosynthesis of unsaturated fatty acids     | 42    | 1    | 0.80304  | 1              | 0       |

|                              |    |   |         |   |   |
|------------------------------|----|---|---------|---|---|
| Aminoacyl-tRNA biosynthesis  | 64 | 1 | 0.91763 | 1 | 0 |
| Steroid hormone biosynthesis | 67 | 1 | 0.92694 | 1 | 0 |
| Purine metabolism            | 68 | 1 | 0.92981 | 1 | 0 |

Total, the total number of compounds in the pathway; Hits, the actually matched number from the user uploaded data; Raw  $p$ , the original  $P$ -value calculated from the enrichment analysis; Holm adjust,  $P$ -value adjusted by Holm-Bonferroni method; Impact, the pathway impact value calculated from pathway topology analysis.

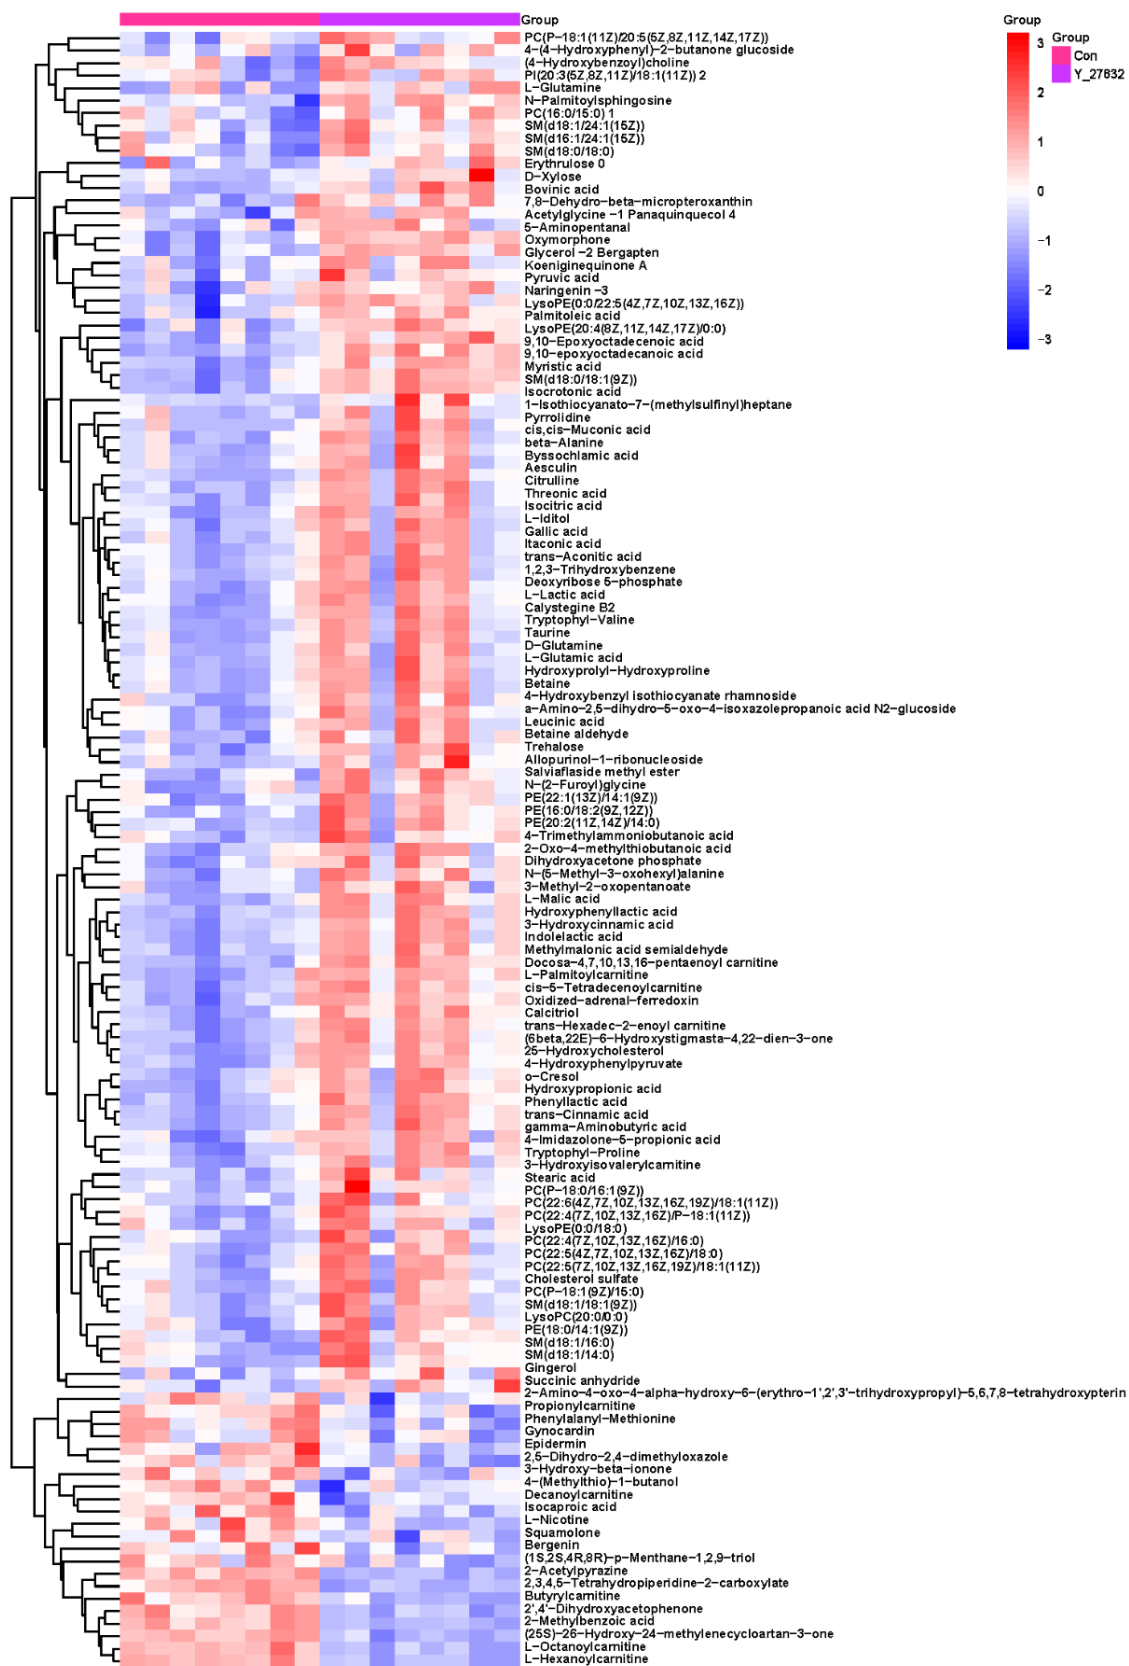

**Figure S1.** Hierarchical cluster analysis thermogram of differential metabolites of goat sperm in control group and Y-27632 group.

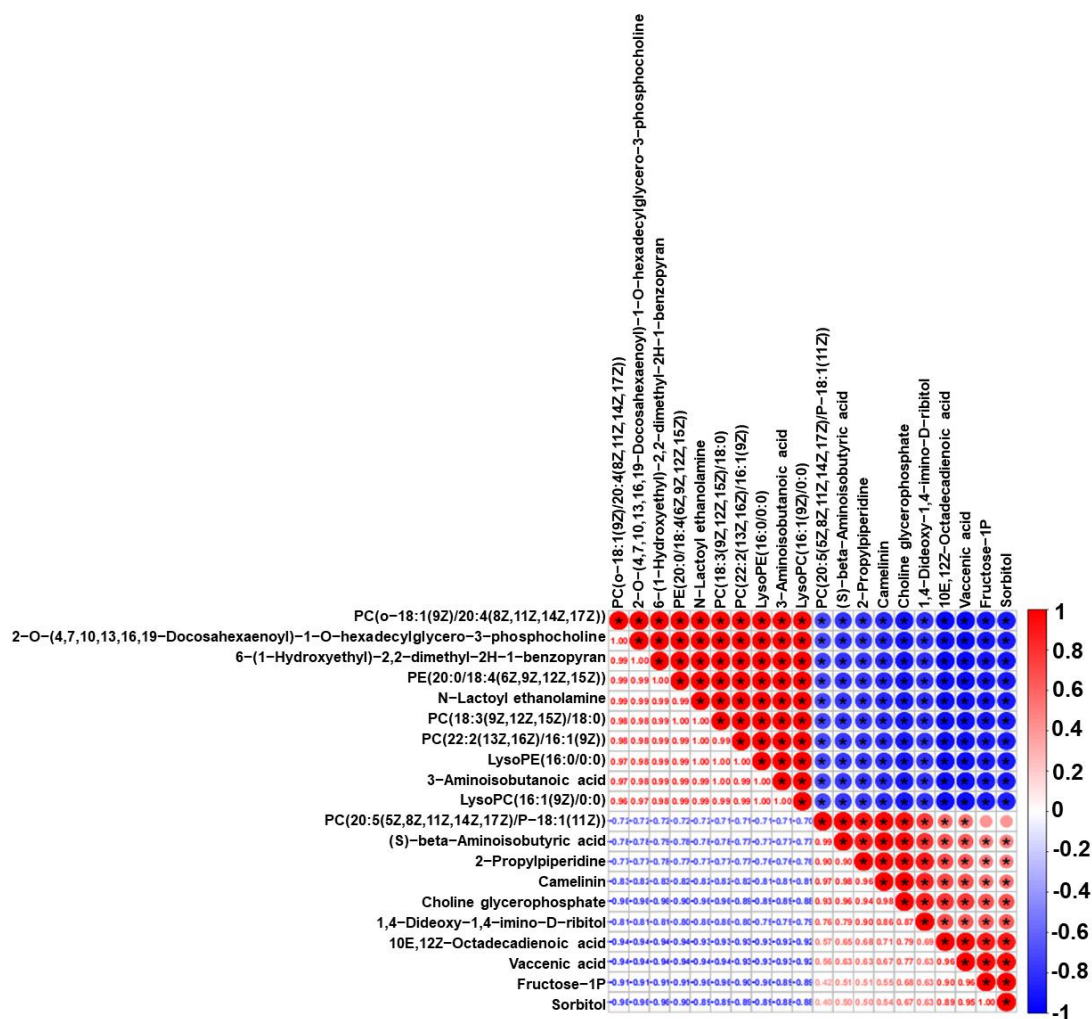

**Figure S2.** Hierarchical cluster analysis thermogram of differential metabolites of goat sperm and sheep sperm.
